# Supplementary material for: Circulating MicroRNA-21 and MicroRNA-122 as Prognostic Biomarkers in Hepatocellular Carcinoma Patients Treated with Transarterial Chemoembolization
Source: MDPI journal article supplement (doi:10.3390/biomedicines9080890), 2021-07-25
Supplement: s1 [file s1]

**Table S1.** Levels of miRNAs (miR-93, miR-103a, miR-425) used as internal reference controls for normalization in our study.

|                  | miR-93          | miR-103a        | miR-425         |
|------------------|-----------------|-----------------|-----------------|
| Healthy subjects | 13.60 ± 0.56 ct | 13.37 ± 0.62 ct | 16.12 ± 0.77 ct |
| Cirrhotics       | 13.89 ± 1.41 ct | 13.72 ± 1.47 ct | 16.14 ± 1.32 ct |
| HCC pre-TACE     | 14.79 ± 1.91 ct | 14.67 ± 2.02 ct | 16.78 ± 1.52 ct |
| HCC post-TACE    | 15.11 ± 2.11 ct | 15.06 ± 2.30 ct | 17.12 ± 1.63 ct |

miRNA levels, expressed as threshold cycles (ct), are reported in the table as mean ± standard deviation (SD).

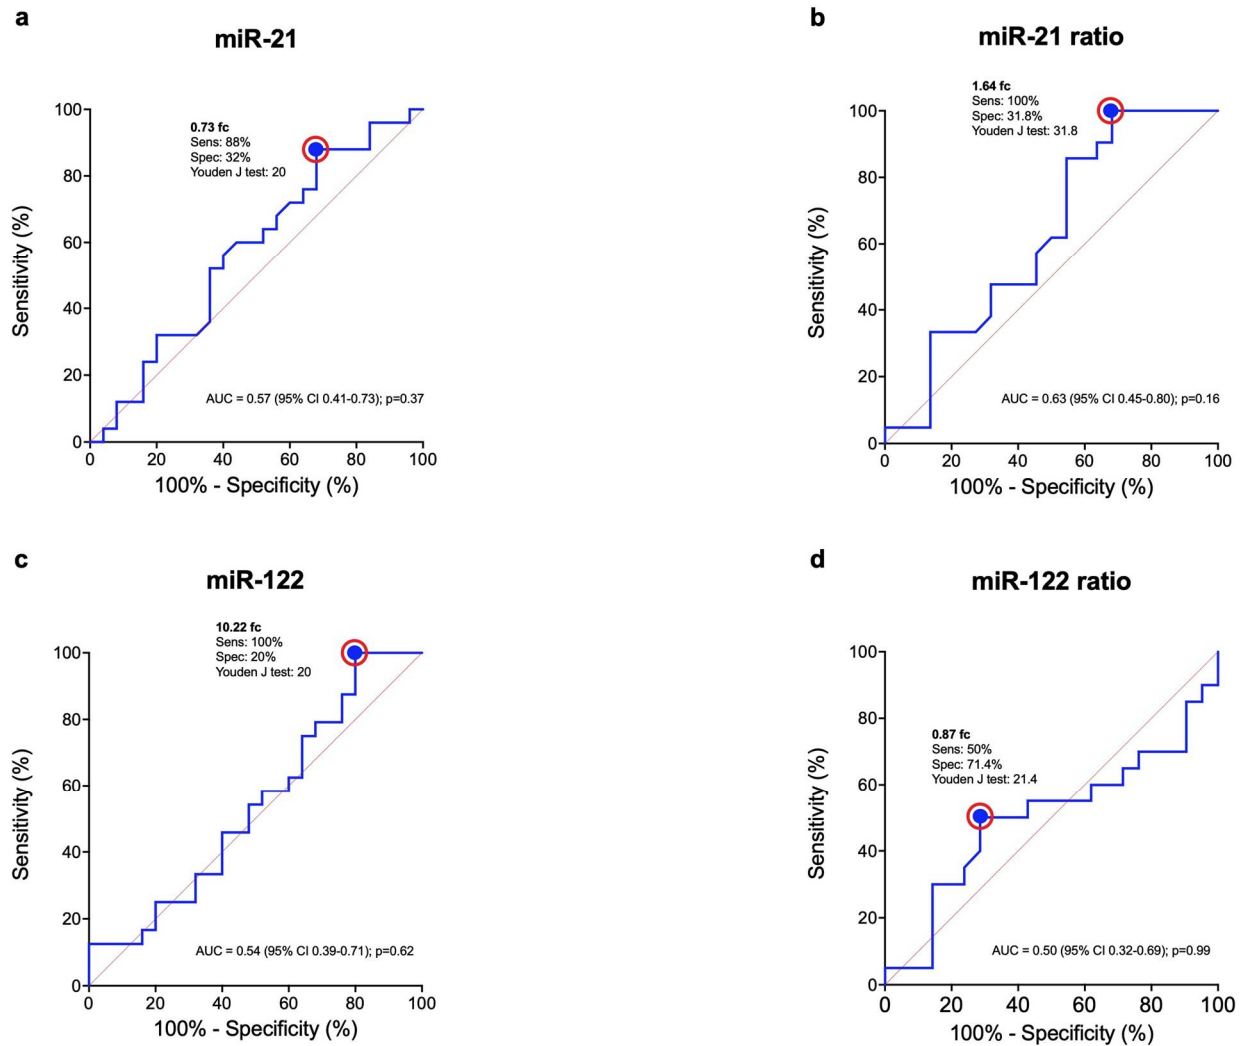

**Figure S1.** ROC curves used to identify the cut-off for miR-21 (a), miR-21 ratio (b), miR-122 (c) and miR-122 ratio (d).

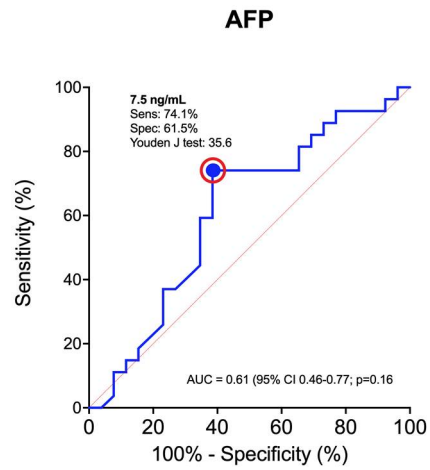

**Figure S2.** ROC curve for the identification of AFP cut-off.

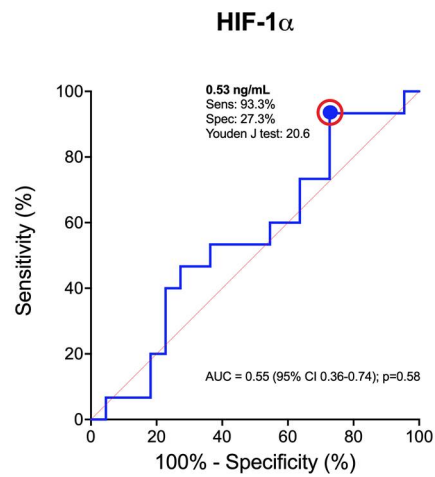

**Figure S3.** ROC curve for the identification of HIF-1 $\alpha$  cut-off.
